# Supplementary material for: Mining Salt Tolerance SNP Loci and Prediction of Candidate Genes in the Rice Bud Stage by Genome-Wide Association Analysis
Source: MDPI journal article supplement (doi:10.3390/plants12112163), 2023-05-30
Supplement: s1 [file s1]

## Supplementary Tables

**Supplementary Table S1.** SNP loci associated with GP, SL and RL in 173 rice accessions in 2020 and 2021.

| Trait | QTLs          | Chr. | Position | P value               | R <sup>2</sup> (%) | Year | Cloned genes                       | Reference                                 |
|-------|---------------|------|----------|-----------------------|--------------------|------|------------------------------------|-------------------------------------------|
| GP    | <i>qGP1-1</i> | 1    | 23315502 | $3.62 \times 10^{-4}$ | 7.7                | 2021 |                                    |                                           |
|       | <i>qGP1-2</i> | 1    | 38188498 | $5.28 \times 10^{-5}$ | 12.2               | 2020 |                                    |                                           |
|       | <i>qGP2</i>   | 2    | 22320650 | $7.32 \times 10^{-5}$ | 11.8               | 2020 |                                    |                                           |
|       | <i>qGP5</i>   | 5    | 26737258 | $2.90 \times 10^{-4}$ | 10.0               | 2021 |                                    |                                           |
|       | <i>qGP8</i>   | 8    | 19288943 | $1.28 \times 10^{-4}$ | 9.0                | 2021 |                                    |                                           |
| SL    | <i>qSL2-1</i> | 2    | 546557   | $2.50 \times 10^{-4}$ | 8.2                | 2020 | <i>OsWRKY55</i><br><i>OsWRKY31</i> | Xie et al. [56],<br>and Zhang et al. [57] |
|       | <i>qSL2-2</i> | 2    | 796597   | $2.89 \times 10^{-4}$ | 9.7                | 2021 |                                    |                                           |
|       | <i>qSL9-1</i> | 9    | 22686236 | $1.99 \times 10^{-4}$ | 10.5               | 2020 | <i>OsISAP1</i> ,<br><i>OsSAP1</i>  | Giri et al. [58]                          |
| RL    | <i>qRL1-1</i> | 1    | 9011153  | $9.26 \times 10^{-6}$ | 11.9               | 2021 |                                    |                                           |
|       | <i>qRL1-2</i> | 1    | 42655740 | $5.52 \times 10^{-5}$ | 11.8               | 2021 |                                    |                                           |
|       | <i>qRL3</i>   | 3    | 13222991 | $5.60 \times 10^{-5}$ | 11.8               | 2021 |                                    |                                           |
|       | <i>qRL4-1</i> | 4    | 11933878 | $2.74 \times 10^{-6}$ | 16.2               | 2020 |                                    |                                           |
|       | <i>qRL4-2</i> | 4    | 21289404 | $3.79 \times 10^{-5}$ | 12.6               | 2020 |                                    |                                           |
|       | <i>qRL9-1</i> | 9    | 8687057  | $4.47 \times 10^{-5}$ | 12.1               | 2021 | <i>OsMYBc</i><br><i>OsZIP71</i>    | Wang et al. [59]<br>Liu et al. [60]       |

GP: Germination potential; SL: Seedling length; RL: Root length;

56. Xie Z, Zhang ZL, Zou X, Huang J, Ruas P, Thompson D, Shen QJ. Annotations and functional analyses of the rice WRKY gene superfamily reveal positive and negative regulators of abscisic acid signaling in aleurone cells. *Plant Physiol.* **2005**, 137, 176-89; DOI:10.1104/pp.104.054312.
57. Zhang J, Peng Y, Guo Z. Constitutive expression of pathogen-inducible OsWRKY31 enhances disease resistance and affects root growth and auxin response in transgenic rice plants. *Cell Res.* **2008**, 18, 508-21; DOI:10.1038/cr.2007.104.
58. Giri J, Vij S, Dansana PK, Tyagi AK. Rice A20/AN1 zinc-finger containing stress-associated proteins (SAP1/11) and a receptor-like cytoplasmic kinase (OsRLCK253) interact via A20 zinc-finger and confer abiotic stress tolerance in transgenic Arabidopsis plants. *New Phytol.* **2011**, 191, 721-732; DOI: 10.1111/j.1469-8137.2011.03740.x.
59. Wang R, Jing W, Xiao L, Jin Y, Shen L, Zhang W. The Rice High-Affinity Potassium Transporter1;1 Is Involved in Salt Tolerance and Regulated by an MYB-Type Transcription Factor. *Plant Physiol.* **2015**, 168, 1076-90; DOI:10.1104/pp.15.00298.
60. Liu C, Mao B, Ou S, Wang W, Liu L, Wu Y, Chu C, Wang X. OsZIP71, a bZIP transcription factor, confers salinity and drought tolerance in rice. *Plant Mol Biol.* **2014**, 84, 19-36; DOI: 10.1007/s11103-013-0115-3.

**Supplementary Table S2.** Gene and functional annotation of SNP loci

| QTL            | MSU ID                | Feature Notes                                           |
|----------------|-----------------------|---------------------------------------------------------|
| <i>qGPR2-1</i> | <i>LOC_Os02g40590</i> | expressed protein                                       |
|                | <i>LOC_Os02g40600</i> | expressed protein                                       |
|                | <i>LOC_Os02g40610</i> | expressed protein                                       |
|                | <i>LOC_Os02g40620</i> | expressed protein                                       |
|                | <i>LOC_Os02g40630</i> | expressed protein                                       |
|                | <i>LOC_Os02g40640</i> | expressed protein                                       |
|                | <i>LOC_Os02g40650</i> | expressed protein                                       |
|                | <i>LOC_Os02g40664</i> | zinc finger family protein                              |
|                | <i>LOC_Os02g40680</i> | mis12 protein, expressed                                |
|                | <i>LOC_Os02g40690</i> | expressed protein                                       |
|                | <i>LOC_Os02g40700</i> | enzyme of the cupin superfamily protein                 |
|                | <i>LOC_Os02g40710</i> | ammonium transporter protein                            |
|                | <i>LOC_Os02g40730</i> | ammonium transporter protein                            |
|                | <i>LOC_Os02g40750</i> | pentatricopeptide domain containing protein             |
|                | <i>LOC_Os02g40760</i> | expressed protein                                       |
|                | <i>LOC_Os02g40770</i> | SET domain containing protein                           |
|                | <i>LOC_Os02g40784</i> | WAX2                                                    |
|                | <i>LOC_Os02g40800</i> | expressed protein                                       |
|                | <i>LOC_Os02g40810</i> | Zinc finger, ZZ type domain containing protein          |
|                | <i>LOC_Os02g40820</i> | expressed protein                                       |
|                | <i>LOC_Os02g40830</i> | succinyl-CoA ligase beta-chain, mitochondrial precursor |
|                | <i>LOC_Os02g40840</i> | alcohol oxidase                                         |

---

|              |                       |                                                                |
|--------------|-----------------------|----------------------------------------------------------------|
|              | <i>LOC_Os02g40850</i> | retrotransposon protein                                        |
|              | <i>LOC_Os02g40860</i> | CK1_CaseinKinase_1.5-CK1 includes the casein kinase 1 kinases  |
|              | <i>LOC_Os02g40870</i> | phosphatidylinositol N-acetylglucosaminyltransferase subunit C |
|              | <i>LOC_Os02g40880</i> | ribosomal protein L14                                          |
|              | <i>LOC_Os02g40890</i> | GLTP domain containing protein                                 |
|              | <i>LOC_Os02g40900</i> | RNA recognition motif containing protein                       |
|              | <i>LOC_Os02g40910</i> | hypothetical protein                                           |
|              | <i>LOC_Os02g40920</i> | transposon protein, CACTA, En/Spm sub-class                    |
|              | <i>LOC_Os09g28240</i> | expressed protein                                              |
|              | <i>LOC_Os09g28250</i> | retrotransposon protein                                        |
|              | <i>LOC_Os09g28260</i> | retrotransposon protein, Ty3-gypsy subclass                    |
|              | <i>LOC_Os09g28270</i> | retrotransposon protein                                        |
|              | <i>LOC_Os09g28280</i> | gibberellin receptor GID1L2                                    |
|              | <i>LOC_Os09g28290</i> | hypothetical protein                                           |
|              | <i>LOC_Os09g28300</i> | remorin C-terminal domain containing protein                   |
| <i>qSLR9</i> | <i>LOC_Os09g28310</i> | bZIP transcription factor                                      |
|              | <i>LOC_Os09g28320</i> | expressed protein                                              |
|              | <i>LOC_Os09g28330</i> | transposon protein                                             |
|              | <i>LOC_Os09g28340</i> | expressed protein                                              |
|              | <i>LOC_Os09g28354</i> | CPuORF39 - conserved peptide uORF-containing transcript        |
|              | <i>LOC_Os09g28370</i> | retrotransposon protein                                        |
|              | <i>LOC_Os09g28380</i> | hypothetical protein                                           |

---

---

|                       |                                    |
|-----------------------|------------------------------------|
| <i>LOC_Os09g28390</i> | cytochrome P450                    |
| <i>LOC_Os09g28400</i> | alpha-amylase precursor            |
| <i>LOC_Os09g28410</i> | expressed protein                  |
| <i>LOC_Os09g28420</i> | alpha-amylase precursor            |
| <i>LOC_Os09g28440</i> | AP2 domain containing protein      |
| <i>LOC_Os09g28450</i> | Paramyosin                         |
| <i>LOC_Os09g28470</i> | leucine-rich repeat family protein |
| <i>LOC_Os09g28460</i> | xyloglucan fucosyltransferase      |
| <i>LOC_Os09g28480</i> | expressed protein                  |

---

**Supplementary Table S3.** Names and origins of 173 rice accessions used for association mapping.

| Code | Germplasm name        | Origin                      | Latitude | Longitude | Germplasm IDa |
|------|-----------------------|-----------------------------|----------|-----------|---------------|
| 1    | Liuyezhan             | Hubei, China                | 30       | 114       | 17-00524      |
| 2    | Shufeng 101           | Sichuan, China              | 30.39    | 104.05    | ZD-00760      |
| 3    | Chengnongshuijing     | Sichuan, China              | 30.39    | 104.05    | ZD-03386      |
| 4    | Guichao 2hao          | Guangdong, China            | 23.08    | 113.15    | H1645         |
| 5    | Zaoxian 14            | Anhui, China                | 37.51    | 117.18    | 11-00670      |
| 6    | Chenwan 3hao          | Hunan, China                | 28.11    | 113       | ZD-00358      |
| 7    | Xiang aizao 10hao     | Hunan, China                | 28.11    | 113       | ZD-01402      |
| 8    | Dig ludo              | Sihong, Jiangsu, China      | 33.46    | 118.23    | H1312         |
| 9    | Su jing 353           | Suzhou, Jiangsu, China      | 31.32    | 120.62    | C1511         |
| 10   | Huaidao 8hao          | Huaian, Jiangsu, China      | 33.5     | 119.15    | SS200410      |
| 11   | Sihao 4385            | Sihong, Jiangsu, China      | 33.46    | 118.23    | H1315         |
| 12   | Dongzheng 1640        | Hongze, Jiangsu, China      | 33.28    | 118.85    | C1515         |
| 13   | Huaidao 9hao          | Huaian, Jiangsu, China      | 33.5     | 119.15    | SS200607      |
| 14   | Huifeng 2             | Yancheng, Jiangsu, China    | 33.38    | 120.13    | C1509         |
| 15   | Yandao 9hao           | Yancheng, Jiangsu, China    | 33.38    | 120.13    | SS200506      |
| 16   | Lianjing 4hao         | Lianyungang, Jiangsu, China | 34.59    | 119.16    | SS200704      |
| 17   | Yandao 8hao           | Yancheng, Jiangsu, China    | 33.38    | 120.13    | SS200307      |
| 18   | Huifeng 1             | Yancheng, Jiangsu, China    | 33.38    | 120.13    | C1508         |
| 19   | Huaidao 11hao         | Huaian, Jiangsu, China      | 33.5     | 119.15    | SS200805      |
| 20   | Sihao 4141            | Sihong, Jiangsu, China      | 33.46    | 118.23    | H1332         |
| 21   | Sihao 4029            | Sihong, Jiangsu, China      | 33.46    | 118.23    | H1333         |
| 22   | Sihao 4259            | Sihong, Jiangsu, China      | 33.46    | 118.23    | H1334         |
| 23   | Sihao 4081            | Sihong, Jiangsu, China      | 33.46    | 118.23    | H1337         |
| 24   | Sihao 4041            | Sihong, Jiangsu, China      | 33.46    | 118.23    | H1338         |
| 25   | Yandao 6hao           | Yancheng, Jiangsu, China    | 33.38    | 120.13    | SS200205      |
| 26   | Sihao 4031            | Sihong, Jiangsu, China      | 33.46    | 118.23    | H1340         |
| 27   | Zhenghan 2hao         | Zhengzhou, Henan, China     | 34.76    | 113.65    | GS2003031     |
| 28   | Yujing 6hao           | Zhengzhou, Henan, China     | 34.76    | 113.65    | GS980002      |
| 29   | Cbao                  | Hefei, Anhui, China         | 31.86    | 117.27    | H1661         |
| 30   | Jingnuo 330           | Hefei, Anhui, China         | 31.86    | 117.27    | H1346         |
| 31   | Wandao 68             | Hefei, Anhui, China         | 31.86    | 117.27    | WPS03010384   |
| 32   | Wanjingnuo            | Hefei, Anhui, China         | 31.86    | 117.27    | H1653         |
| 33   | Zhongjing 212         | Nanjing, Jiangsu, China     | 32.04    | 118.78    | WS891061      |
| 34   | Xiangjing 9407        | Nanjing, Jiangsu, China     | 32.04    | 118.78    | LS891061      |
| 35   | Dongzhengwuyunjing 21 | Hongze, Jiangsu, China      | 33.28    | 118.85    | SS200705-1    |
| 36   | Malaihong             | Nanjing, Jiangsu, China     | 32.04    | 118.78    | T050          |
| 37   | Zhengdao 10hao        | Zhenjiang, Jiangsu, China   | 32.2     | 119.44    | SS200710      |
| 38   | Huajing 6hao          | Huaian, Jiangsu, China      | 33.5     | 119.15    | SS200706      |
| 39   | Huajing 5hao          | Huaian, Jiangsu, China      | 33.5     | 119.15    | SS200505      |
| 40   | Zhongjing 9677        | Nanjing, Jiangsu, China     | 32.04    | 118.78    | C1512         |
| 41   | Suwujing              | Wujin, Jiangsu, China       | 31.78    | 119.95    | SS201009      |
| 42   | Wuyunjing 8hao        | Wujin, Jiangsu, China       | 31.78    | 119.95    | SZS313        |
| 43   | Nannongjing 004       | Nanjing, Jiangsu, China     | 32.04    | 118.78    | T248          |
| 44   | Ningjinghui 260       | Nanjing, Jiangsu, China     | 32.04    | 118.78    | H1371         |
| 45   | Nannongjing 1R        | Nanjing, Jiangsu, China     | 32.04    | 118.78    | H1372         |

|    |                        |                                 |       |        |            |
|----|------------------------|---------------------------------|-------|--------|------------|
| 46 | Yuedao 12              | Vietnam                         | 10.22 | 106.01 | Y1A02375   |
| 47 | Ningjinghui 237        | Nanjing, Jiangsu, China         | 32.04 | 118.78 | H1374      |
| 48 | Hongmangshajing        | Kunshan, Jiangsu, China         | 31.39 | 120.95 | T630       |
| 49 | Wumangyedao            | Jinshan, Shanghai, China        | 30.75 | 121.33 | T335       |
| 50 | Xiaobaidao             | Wuxian, Jiangsu, China          | 31.32 | 120.62 | T208       |
| 51 | Xiepihuang             | Taicang, Jiangsu, China         | 31.45 | 121.1  | T203       |
| 52 | Baoxintaihuqing        | Wujiang, Jiangsu, China         | 31.16 | 120.63 | T834       |
| 53 | Baikenuo               | Wujiang, Jiangsu, China         | 31.16 | 120.63 | T354       |
| 54 | Shengtangqing          | Changshu, Jiangsu, China        | 31.64 | 120.74 | T759       |
| 55 | Hongjiaozhan           | Wuxian, Jiangsu, China          | 31.32 | 120.62 | T888       |
| 56 | Yuedao24(LCV18)        | Vietnam                         | 10.22 | 106.01 |            |
| 57 | Wanhuangdao            | Wuxian, Jiangsu, China          | 31.32 | 120.62 | T815       |
| 58 | Zaoshirihuangdao       | Wuxian, Jiangsu, China          | 31.32 | 120.62 | T728       |
| 59 | 24248                  | Nanjing, Jiangsu, China         | 32.04 | 118.78 |            |
| 60 | Kangbingyueguang       | Japan                           | 35.68 | 139.69 | H1524      |
| 61 | Youzhiyueguang         | Japan                           | 35.68 | 139.69 | Y1A01876   |
| 62 | Haobuqia               | Wuxian, Jiangsu, China          | 31.32 | 120.62 | 21-00357   |
| 63 | Xu91075                | Xuzhou, Jiangsu, China          | 34.26 | 117.2  | H1418      |
| 64 | Xudao 25-7             | Xuzhou, Jiangsu, China          | 34.26 | 117.2  | H1419      |
| 65 | 863B                   | Nanjing, Jiangsu, China         | 32.04 | 118.78 | H1425      |
| 66 | 9522B                  | Changzhou, Jiangsu, China       | 31.79 | 119.95 | GS20000008 |
| 67 | Yuedao 68              | Vietnam                         | 10.22 | 106.01 | Y1A02418   |
| 68 | Biaojiyongzijing       | Nanjing, Jiangsu, China         | 32.04 | 118.78 | H1427      |
| 69 | Zigu                   | Nanjing, Jiangsu, China         | 32.04 | 118.78 | H1437      |
| 70 | SH189                  | Sihong, Jiangsu, China          | 33.46 | 118.23 | Y1A01866   |
| 71 | SHN1                   | Sihong, Jiangsu, China          | 33.46 | 118.23 | Y1A01867   |
| 72 | Jiangpuchangliheimidao | Nanjing, Jiangsu, China         | 32.04 | 118.78 | H1492      |
| 73 | Chuan 6xian            | Chengdu, Sichuan, China         | 30.67 | 104.06 | H1506      |
| 74 | Chuan 5xian            | Chengdu, Sichuan, China         | 30.67 | 104.06 | H1507      |
| 75 | Ludao                  | Nanjing, Jiangsu, China         | 32.04 | 118.78 | H1508      |
| 76 | A7444                  | Nanjing, Jiangsu, China         | 32.04 | 118.78 | H1476      |
| 77 | Qing 7                 | Yancheng, Jiangsu, China        | 33.38 | 120.13 | H1471      |
| 78 | Yuedao 3               | Vietnam                         | 10.22 | 106.01 | Y1A02370   |
| 79 | Longnuo 3hao           | Haerbin, Heilongjiang, China    | 44.04 | 125.42 | HS2009015  |
| 80 | Longjing 28            | Haerbin, Heilongjiang, China    | 44.04 | 125.42 | HS2009011  |
| 81 | Longjing 27            | Haerbin, Heilongjiang, China    | 44.04 | 125.42 | HS2009010  |
| 82 | Longjing 20            | Haerbin, Heilongjiang, China    | 44.04 | 125.42 | HS2007004  |
| 83 | Mudanjiang 28          | Mudanjiang, Heilongjiang, China | 44.58 | 129.6  | HS2006006  |
| 84 | Longjing 22            | Haerbin, Heilongjiang, China    | 44.04 | 125.42 | HS2008010  |
| 85 | Yuedao 32              | Vietnam                         | 10.22 | 106.01 | Y1A02326   |
| 86 | Longdao 8hao           | Haerbin, Heilongjiang, China    | 44.04 | 125.42 | HS2008019  |
| 87 | Longdao 6hao           | Haerbin, Heilongjiang, China    | 44.04 | 125.42 | HS2006004  |

|     |                 |                                   |       |        |               |
|-----|-----------------|-----------------------------------|-------|--------|---------------|
|     |                 | China                             |       |        |               |
| 88  | Jianongnuo 2hao | Haerbin, Heilongjiang, China      | 44.04 | 125.42 | H1600         |
| 89  | Wunuoyihao      | Haerbin, Heilongjiang, China      | 44.04 | 125.42 | H1611         |
| 90  | Zhongzuo 93     | Mudanjiang, Heilongjiang, China   | 44.6  | 129.58 | JS1995001     |
| 91  | Xudao 4hao      | Xuzhou, Jiangsu, China            | 34.15 | 117.11 | CNA20040007.X |
| 92  | Xudao 5hao      | Xuzhou, Jiangsu, China            | 34.15 | 117.11 | GS2006059     |
| 93  | Yuedao 37       | Vietnam                           | 10.22 | 106.01 | Y1A02397      |
| 94  | Xudao2hao       | Xuzhou, Jiangsu, China            | 34.15 | 117.11 |               |
| 95  | Shengdao808     | Haerbin, Helongjiang, China       | 44.04 | 125.42 |               |
| 96  | Shengdao 14     | Jinan, Shandong, China            | 36.4  | 117    | H1701         |
| 97  | Yangguang 200   | Xuzhou, Jiangsu, China            | 34.15 | 117.11 | GS2008043     |
| 98  | Yanjing 8hao    | Yancheng, Jiangsu, China          | 33.38 | 120.13 | ZD-05649      |
| 99  | Zaijinjing      | Songhuajiang, Heilongjiang, China | 41.42 | 119.52 | H1614         |
| 100 | Sihao 4280      | Sihong, Jiangsu, China            | 33.46 | 118.23 | H1705         |
| 101 | Sihao 4330      | Sihong, Jiangsu, China            | 33.46 | 118.23 | H1704         |
| 102 | Sihao 4040      | Sihong, Jiangsu, China            | 33.46 | 118.23 | H1703         |
| 103 | Yuedao 55       | Vietnam                           | 10.22 | 106.01 | Y1A02409      |
| 104 | Yanjing 9hao    | Yancheng, Jiangsu, China          | 33.38 | 120.13 | SS200707      |
| 105 | Yangfujing 4901 | Yangzhou, Jiangsu, China          | 32.24 | 119.26 | SS200811      |
| 106 | Zhengdao 18     | Zhenzhou, Henan, China            | 34.76 | 113.65 | GS2007033     |
| 107 | Zhen9424        | Zhenjiang, Jiangsu, China         | 32.12 | 119.27 | ZD-05658      |
| 108 | Nannongjing3786 | Haerbin, Heilongjiang, China      | 44.04 | 125.42 |               |
| 109 | Yangfujing 8hao | Yancheng, Jiangsu, China          | 33.38 | 120.13 | SS200608      |
| 110 | Wuxiang99-8     | Suihua, Heilongjiang, China       | 46.63 | 126.98 |               |
| 111 | Zhendao 99      | Zhenjiang, Jiangsu, China         | 32.12 | 119.27 | SS200106      |
| 112 | Ningjing 2hao   | Nanjing, Jiangsu, China           | 32.04 | 118.78 | WPS05010476   |
| 113 | Yuedao 107      | Vietnam                           | 10.22 | 106.01 | Y1A02368      |
| 114 | Yangfujing 7hao | Yangzhou, Jiangsu, China          | 32.24 | 119.26 | SS200413      |
| 115 | Wanqu 429bp     | Haerbin, Heilongjiang, China      | 44.04 | 125.42 | HS2013003     |
| 116 | Xudao 3hao      | Haerbin, Heilongjiang, China      | 34.26 | 117.2  | SS200306      |
| 117 | Xudao9201B      | Xuzhou, Jiangsu, China            | 34.15 | 117.11 |               |
| 118 | Wyunjing 21hao  | Wujin, Jiangsu, China             | 31.78 | 119.95 | SS200705-2    |
| 119 | Zhongjing 131   | Haerbin, Heilongjiang, China      | 44.04 | 125.42 | H1620         |
| 120 | Suyunuo         | Haerbin, Heilongjiang, China      | 34.26 | 117.2  | T832          |
| 121 | Ebusinuodao     | Suihua, Heilongjiang, China       | 46.63 | 126.98 | T386          |
| 122 | Yaxuenuo        | China                             | 31.26 | 121.63 | T480          |
| 123 | Yuedao 108      | Wuxian, Jiangsu, China            | 10.22 | 106.01 | Y1A02355      |
| 124 | Luohanhuang     | Vietnam                           | 31.92 | 120.29 | T560          |
|     |                 | Jiangyin, Jiangsu, China          |       |        |               |

|     |                      |                            |       |        |              |       |
|-----|----------------------|----------------------------|-------|--------|--------------|-------|
| 125 | Yuedao 41            | Vietnam                    | 10.22 | 106.01 | Y1A02328     |       |
| 126 | Yuedao 43            | Vietnam                    | 10.22 | 106.01 | Y1A02404     |       |
| 127 | Yuedao 48            | Vietnam                    | 10.22 | 106.01 | Y1A02407     |       |
| 128 | Yuedao 49            | Vietnam                    | 10.22 | 106.01 | Y1A02408     |       |
| 129 | Yuedao 61            | Vietnam                    | 10.22 | 106.01 | Y1A02413     |       |
| 130 | Yuedao 9             | Vietnam                    | 10.22 | 106.01 | Y1A02373     |       |
| 131 | Yuedao 13            | Vietnam                    | 10.22 | 106.01 | Y1A02320     |       |
| 132 | Yuedao 22            | Vietnam                    | 10.22 | 106.01 | Y1A02382     |       |
| 133 | Yuedao 50            | Vietnam                    | 10.22 | 106.01 | Y1A02331     |       |
| 134 | Yuedao 62            | Vietnam                    | 10.22 | 106.01 | Y1A02414     |       |
| 135 | Yuedao 66            | Vietnam                    | 10.22 | 106.01 | Y1A02417     |       |
| 136 | Yuedao 109           | Vietnam                    | 10.22 | 106.01 | Y1A02356     |       |
| 137 | IR112                | Philippines                | 14.6  | 121    | H1501        |       |
| 138 | IR64                 | Philippines                | 14.6  | 121    | H1502        |       |
| 139 | Hainanxian R         | Hainan, China              | 19.52 | 109.57 | H1504        |       |
| 140 | Zajiaohaigu          | Changjiang, Hainan, China  | 19.25 | 109.03 | H1510        |       |
| 141 | Diantun502xuanzao    | Kunming, Yunnan, China     | 25.04 | 102.73 | ZD-05551     |       |
| 142 | Nongxiang 21         | Changsha, Hunan, China     | 28.21 | 113    | CNA200802496 |       |
| 143 | Nongxiang 25         | Changsha, Hunan, China     | 28.21 | 113    | GS2001021    |       |
| 144 | Fengyouwan 8hao      | Changsha, Hunan, China     | 28.21 | 113    | YS2009001    |       |
| 145 | Nongxiang26          | Changsha, Hunan, China     | 28.21 | 113    |              |       |
| 146 | Xiangwanxian 17      | Changsha, Hunan, China     | 28.21 | 113    | XS2008035    |       |
| 147 | Yuzhenxiang          | Changsha, Hunan, China     | 28.21 | 113    | XS2009038    |       |
| 148 | Nuohangu             | Kunming, Yunnan, China     | 25.04 | 102.73 | H1434        |       |
| 149 | Lincangwazuhangu     | Kunming, Yunnan, China     | 25.04 | 102.73 | H1435        |       |
| 150 | Xiangxiandao 10hao   | Changsha, Hunan, China     | 28.21 | 113    | H1486        |       |
| 151 | LongtepuB            | Fuzhou, Fujian, China      | 26.08 | 119.3  | H1490        |       |
| 152 | Minghui63            | Sanmingshi, Fujian, China  | 25.3  | 116.22 |              |       |
| 153 | Arias                | Indonesia                  | 6.08  | 94.45  | H1339        |       |
| 154 | Yuetai B             | Fogang, Guangdong, China   | 23.86 | 113.52 | H1493        |       |
| 155 | Qimiaoixiang 2hao    | Qingyuan, Guangdong, China | 23.7  | 113.01 | H1496        |       |
| 156 | Shengyou 2hao        | Gaoyao, Guangdong, China   | 23.05 | 112.44 | YS1994004    |       |
| 157 | II-32B               | Changsha, Hunan, China     | 28.21 | 113    | A0050        |       |
| 158 | CAMOR                | Indonesia                  | 6.08  | 94.45  |              | 10861 |
| 159 | Gendjah Gempol       | Indonesia                  | 6.08  | 94.45  |              | 12483 |
| 160 | Tijin                | Japan                      | 35.68 | 139.69 | H1706        |       |
| 161 | Zhongguo 91          | Japan                      | 35.68 | 139.69 | NL274        |       |
| 162 | Qiutianxiaoding      | Japan                      | 35.68 | 139.69 | H1654        |       |
| 163 | M1004                | Japan                      | 35.68 | 139.69 | Y1A01861     |       |
| 164 | Xiangchuanwuxinbaimi | Japan                      | 35.68 | 139.69 | H1655        |       |
| 165 | BULUH BAWU           | Indonesia                  | 6.08  | 94.45  |              | 16481 |
| 166 | Hongnong 5hao        | Wujiang, Jiangsu, China    | 31.16 | 120.63 | T757         |       |
| 167 | Shenlenuo            | Kunshan, Jiangsu, China    | 31.39 | 120.95 | T691         |       |
| 168 | Yueguang             | Japan                      | 35.68 | 139.69 | H1660        |       |
| 169 | Yimuhu               | Japan                      | 35.68 | 139.69 | Y1A01857     |       |
| 170 | Qingkong             | Nanjing, Jiangsu, China    | 32.04 | 118.78 | Y1A01858     |       |
| 171 | RT61                 | Japan                      | 35.68 | 139.69 | Y1A01863     |       |



|     |             |                        |       |        |           |
|-----|-------------|------------------------|-------|--------|-----------|
| 172 | IL38        | Japan                  | 35.68 | 139.69 | ZD-05554  |
| 173 | Jindao 1007 | Dongli, Tianjin, China | 39.14 | 117.13 | GS2004043 |

---

Table S4. The parameters used for the PLINK software.

| Step                      | Parameters                                                                                                | Note                                                                                                                                   |
|---------------------------|-----------------------------------------------------------------------------------------------------------|----------------------------------------------------------------------------------------------------------------------------------------|
| Sequencing data filtering | plink --geno 0.2 --maf 0.05 --biallelic-only --vcf test.vcf --recode vcf-iid --out Test --allow-extra-chr | "--geno 0.2" sets the deletion rate of more than 20%, and "--maf 0.05" sets the deletion rate of less than 0.05 minor allele frequency |
| Retain unlinked SNP sites | plink --vcf Test.vcf --indep-pairwise 50 10 0.2 --out test.impute --allow-extra-chr                       | --Indep-pairwise 50 10 0.2"sets a 50kb window with a step size of 10 SNPs, and SNP correlation above 0.2                               |
| Extracting SNP sites      | plink --vcf test.impute.vcf --extract test.impute.prune.in --recode vcf-iid --out test.impute.prune.in    | "-- extract" extracts sites from filtered files                                                                                        |
| Format conversion         | plink --vcf test.impute.prune.in.vcf --recode structure --out test.impute.prune.in                        | '-- recode structure' converts the filtered sites into structure format                                                                |

Table S5. The parameters used for the Structure software.

| Parameters                                                                                                                                       |
|--------------------------------------------------------------------------------------------------------------------------------------------------|
| structure -m mainparams_structure_n.cfg -e extraparams -k n -i test.impute.prune.in.recode.strct_in -o Test_structure_k_n_1 -L 38498 -N 173 -D 1 |
| structure -m mainparams_structure_n.cfg -e extraparams -k n -i test.impute.prune.in.recode.strct_in -o Test_structure_k_n_2 -L 38498 -N 173 -D 2 |
| plink --vcf test.impute.vcf --extract test.impute.prune.in --recode vcf-iid --out test.impute.prune.in                                           |
| structure -m mainparams_structure_n.cfg -e extraparams -k n -i test.impute.prune.in.recode.strct_in -o Test_structure_k_n_3 -L 38498 -N 173 -D 3 |

Set n=1-10 inferential subgroup numbers, "- L" to 38498 SNP sites, "- N" to 173 samples, and "- D" to 3 replicates.

## Supplementary Figures

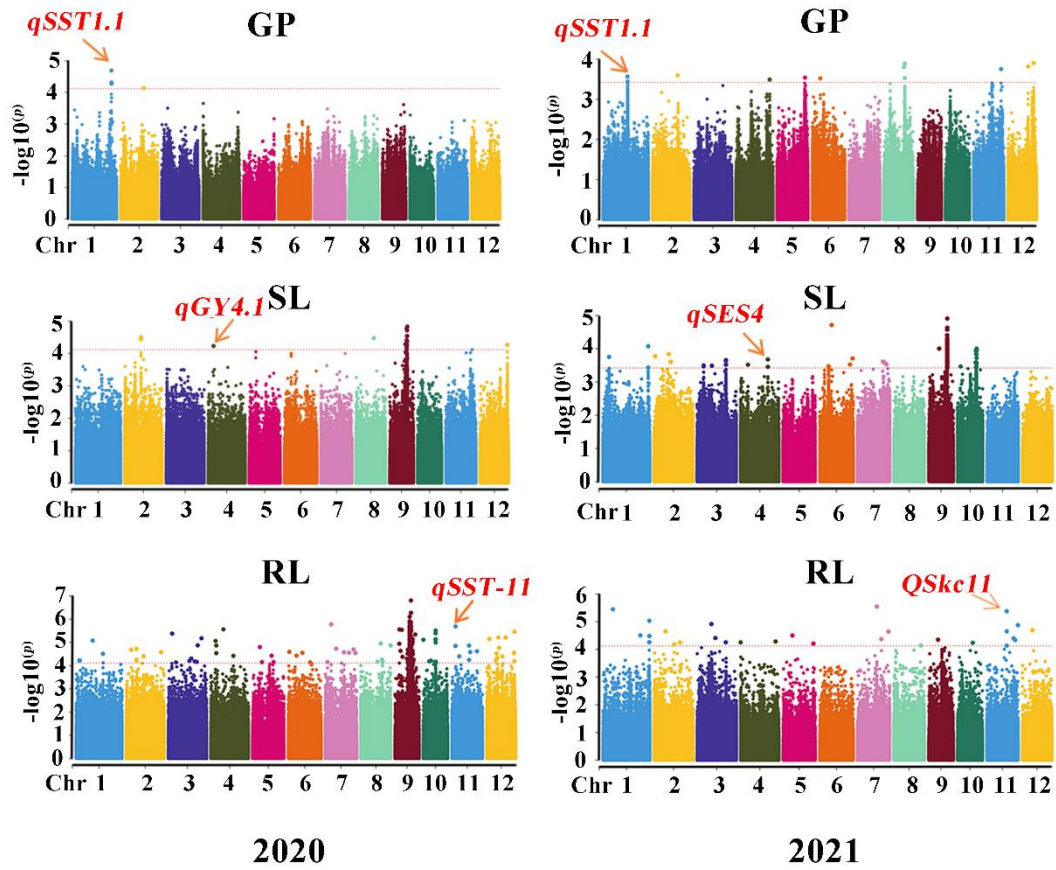

**Figure S1.** Manhattan plot of 173 rice germplasms obtained from GP, SL and RL salt tolerance germination experiments based on SNP markers (2020). Reported QTLs are indicated in the figure.

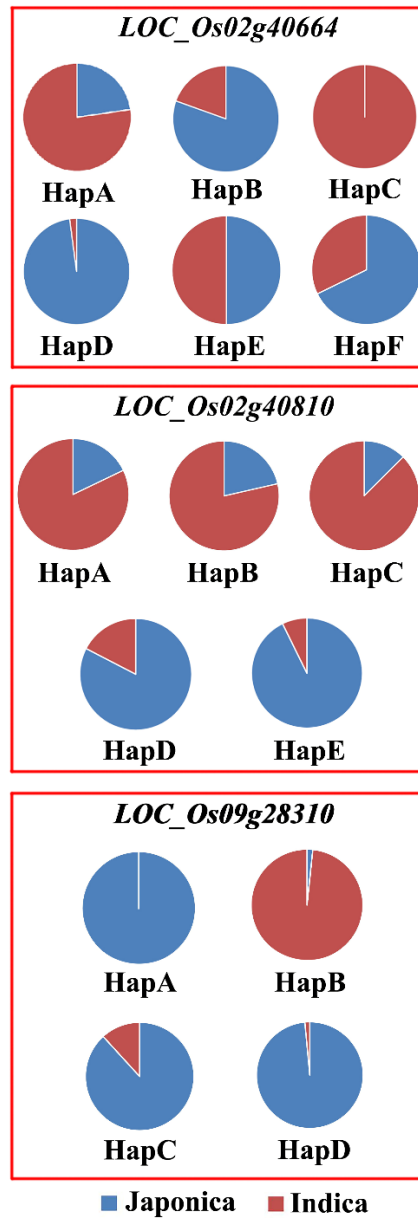

**Figure S2.** The distribution of candidate gene haplotypes in two subpopulations. The red area represents indica rice, and the blue area represents japonica rice.

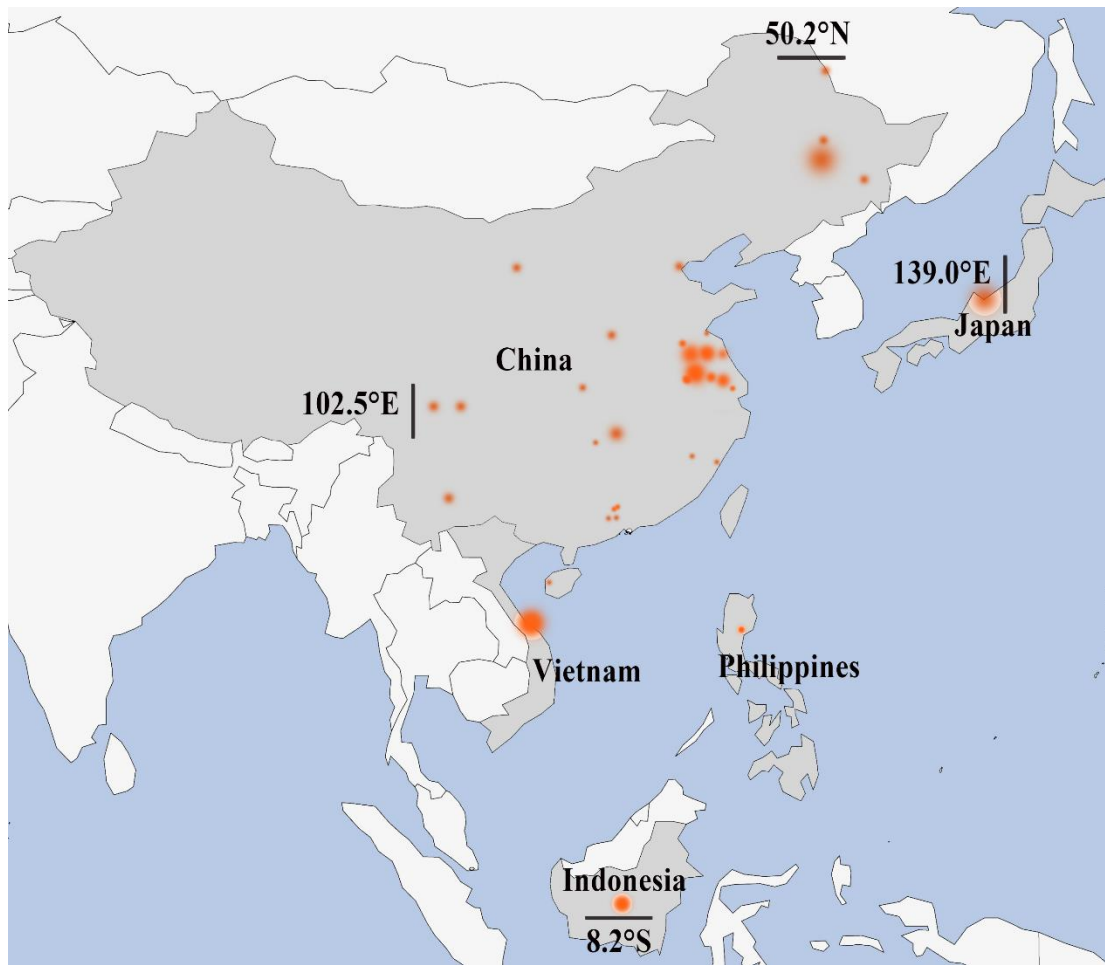

**Figure S3.** Geographical distribution of 173 rice varieties.
